# Supplementary material for: Preoperative Nomogram for Predicting Sentinel Lymph Node Metastasis Risk in Breast Cancer: A Potential Application on Omitting Sentinel Lymph Node Biopsy
Source: PubMed Central journal article supplement (PMC8107679; doi:10.3389/fonc.2021.665240), 2021-04-26
Supplement: DataSheet_1.pdf [file DataSheet_1.pdf]

**Table S1** | Clinicopathologic characteristics of the training and the validation cohort with or without SLN metastasis

| Clinicopathologic features       | Training cohort                  |                               |              | Validation cohort                |                              |                  |
|----------------------------------|----------------------------------|-------------------------------|--------------|----------------------------------|------------------------------|------------------|
|                                  | (n=444)                          |                               | P value      | (n=180)                          |                              | P value          |
|                                  | No SLN metastasis<br>(n=341) (%) | SLN metastasis<br>(n=103) (%) |              | No SLN metastasis<br>(n=136) (%) | SLN metastasis<br>(n=44) (%) |                  |
| <b>Age (y)</b>                   |                                  |                               | 0.094        |                                  |                              | 0.094            |
| ≤35                              | 17 (5.0)                         | 9 (8.7)                       |              | 6 (4.4)                          | 6 (4.4)                      |                  |
| 36-55                            | 208 (61.0)                       | 69 (67.0)                     |              | 87(64.0)                         | 24 (54.5)                    |                  |
| >55                              | 116 (34.0)                       | 25 (24.3)                     |              | 43 (31.6)                        | 14 (31.8)                    |                  |
| <b>BMI (kg/m<sup>2</sup>)</b>    |                                  |                               | <b>0.015</b> |                                  |                              | 0.482            |
| <18.5                            | 12 (3.5)                         | 2 (1.9)                       |              | 1 (0.7)                          | 1 (2.3)                      |                  |
| 18.5-24.9                        | 265 (77.7)                       | 68 (66.0)                     |              | 91 (66.9)                        | 32 (72.7)                    |                  |
| ≥25                              | 64 (18.8)                        | 33 (32.0)                     |              | 44 (32.4)                        | 11 (25.0)                    |                  |
| <b>Menstrual status</b>          |                                  |                               | 0.496        |                                  |                              | 0.391            |
| Pre-                             | 179 (52.5)                       | 58 (56.3)                     |              | 61 (44.9)                        | 23 (52.3)                    |                  |
| Post-                            | 162 (47.5)                       | 45 (43.7)                     |              | 75 (55.1)                        | 21 (47.7)                    |                  |
| <b>Lesion position</b>           |                                  |                               | 0.705        |                                  |                              | 0.327            |
| OUQ                              | 198 (58.1)                       | 57 (55.3)                     |              | 84 (61.8)                        | 25 (56.8)                    |                  |
| OLQ                              | 50 (14.7)                        | 18.4 (4.3)                    |              | 17 (12.5)                        | 9 (20.5)                     |                  |
| IUQ                              | 66 (19.4)                        | 17 (16.5)                     |              | 24 (17.6)                        | 5 (11.4)                     |                  |
| ILQ                              | 18 (5.3)                         | 8 (7.8)                       |              | 8 (5.9)                          | 2 (4.5)                      |                  |
| Center                           | 9 (2.6)                          | 2 (1.9)                       |              | 3 (2.2)                          | 3 (6.8)                      |                  |
| <b>Overall TNM stage</b>         |                                  |                               | <b>0.004</b> |                                  |                              | <b>&lt;0.001</b> |
| 0                                | 25 (7.3)                         | 3 (2.9)                       |              | 1 (0.7)                          | 0 (0.0)                      |                  |
| Ia                               | 197 (57.8)                       | 49 (47.6)                     |              | 47 (34.6)                        | 2 (4.5)                      |                  |
| Ib                               | 53 (15.5)                        | 15 (14.6)                     |              | 86 (63.2)                        | 9 (20.5)                     |                  |
| IIa                              | 49 (14.4)                        | 22 (21.4)                     |              | 1 (0.7)                          | 25 (56.8)                    |                  |
| IIb                              | 15 (4.4)                         | 14 (13.6)                     |              | 1 (0.7)                          | 5 (11.4)                     |                  |
| III                              | 2 (0.6)                          | 0 (0.0)                       |              | 0 (0.0)                          | 3 (6.8)                      |                  |
| <b>Clinical T classification</b> |                                  |                               | <b>0.003</b> |                                  |                              | 0.464            |
| Tis                              | 53 (15.5)                        | 14 (13.6)                     |              | 1 (0.7)                          | 0 (0.0)                      |                  |
| T1                               | 224 (65.7)                       | 53 (51.5)                     |              | 48 (35.3)                        | 11 (25.0)                    |                  |
| T2                               | 64 (18.8)                        | 36 (23.2)                     |              | 86 (63.2)                        | 32 (72.7)                    |                  |
| T3                               | 0 (0.0)                          | 0 (0.0)                       |              | 1 (0.7)                          | 1 (2.3)                      |                  |
| <b>Histological type</b>         |                                  |                               | 0.075        |                                  |                              | 0.330            |
| Ductal                           | 279 (81.8)                       | 74 (71.8)                     |              | 112 (82.4)                       | 32 (72.7)                    |                  |
| Lobular                          | 25 (7.3)                         | 10 (9.7)                      |              | 8 (5.9)                          | 5 (11.4)                     |                  |
| Others                           | 37 (10.9)                        | 19 (18.4)                     |              | 16 (11.8)                        | 7 (15.9)                     |                  |

|                              |            |           |        |            |           |
|------------------------------|------------|-----------|--------|------------|-----------|
| <b>Histological grade</b>    |            |           | 0.176  |            | 0.091     |
| I                            | 77 (22.6)  | 17 (16.5) |        | 6 (4.4)    | 5 (11.4)  |
| II                           | 240 (70.4) | 74 (71.8) |        | 120 (88.2) | 33 (75.0) |
| III                          | 24 (7.0)   | 12 (11.7) |        | 10 (7.4)   | 6 (13.6)  |
| <b>Subtype</b>               |            |           | 0.298  |            | 0.362     |
| Luminal A                    | 203 (59.5) | 61 (59.2) |        | 69 (50.7)  | 23 (52.3) |
| Luminal B                    | 64 (18.8)  | 13 (12.6) |        | 14 (10.3)  | 9 (20.5)  |
| HER2+ (HR-)                  | 19 (5.6)   | 10 (9.7)  |        | 12 (8.8)   | 2 (4.5)   |
| HER2+ (HR+)                  | 17 (5.0)   | 8 (7.8)   |        | 21 (15.4)  | 6 (13.6)  |
| TNBC                         | 38 (11.1)  | 11 (10.7) |        | 20 (14.7)  | 4 (9.1)   |
| <b>ER</b>                    |            |           | 0.314  |            | 0.115     |
| Negative                     | 58 (17.0)  | 22 (21.4) |        | 34 (25.0)  | 6 (13.6)  |
| Positive                     | 283 (83.0) | 81 (78.6) |        | 102 (75.0) | 38 (86.4) |
| <b>PR</b>                    |            |           | 0.151  |            | 0.109     |
| Negative                     | 88 (25.8)  | 34 (33.0) |        | 38 (27.9)  | 7 (15.9)  |
| Positive                     | 253 (74.2) | 69 (67.0) |        | 98 (72.1)  | 37 (84.1) |
| <b>HER2</b>                  |            |           | 0.060  |            | 0.403     |
| Negative                     | 305 (89.4) | 85 (82.5) |        | 103 (75.7) | 36 (81.8) |
| Positive                     | 36 (10.6)  | 18 (17.5) |        | 33 (24.3)  | 8 (18.2)  |
| <b>KI67</b>                  |            |           | 0.079  |            | 0.876     |
| <30%                         | 246 (72.1) | 65 (63.1) |        | 91 (66.9)  | 30 (68.2) |
| >=30%                        | 95 (27.9)  | 38 (36.9) |        | 45 (33.1)  | 14 (31.8) |
| <b>US findings</b>           |            |           |        |            |           |
| <b>BI-RADS</b>               |            |           | 0.526  |            | 0.578     |
| 4A                           | 52 (15.2)  | 13 (12.6) |        | 18 (13.2)  | 5 (11.4)  |
| 4B                           | 57 (16.7)  | 17 (16.5) |        | 23 (16.9)  | 12 (27.3) |
| 4C                           | 84 (24.6)  | 28 (27.2) |        | 42 (30.9)  | 10 (22.7) |
| 5                            | 62 (18.2)  | 25 (24.3) |        | 25 (18.4)  | 7 (15.9)  |
| 6                            | 86 (25.2)  | 20 (19.4) |        | 28 (20.6)  | 10 (22.7) |
| <b>Multifocality</b>         |            |           | 0.243  |            | 0.217     |
| yes                          | 78 (22.9)  | 18 (17.5) |        | 15 (11.0)  | 8 (18.2)  |
| no                           | 263 (77.1) | 85 (82.5) |        | 121 (89.0) | 36 (81.8) |
| <b>Maximum diameter (cm)</b> |            |           | <0.001 |            | 0.060     |
| <2                           | 268 (78.6) | 57 (55.3) |        | 67 (49.3)  | 14 (31.8) |
| 2-5                          | 73 (21.4)  | 30 (29.1) |        | 66 (48.5)  | 30 (68.2) |
| >5                           | 0 (0.0)    | 16 (15.5) |        | 3 (2.2)    | 0 (0.0)   |
| <b>Tumor shape</b>           |            |           | 0.729  |            | 0.117     |
| regular                      | 20 (5.9)   | 7 (6.8)   |        | 13 (9.6)   | 1 (2.3)   |
| unregular                    | 321 (94.1) | 96 (93.2) |        | 123 (90.4) | 43 (97.7) |
| <b>Margin</b>                |            |           | 0.219  |            | 0.912     |

|                           |            |            |                  |                  |
|---------------------------|------------|------------|------------------|------------------|
| distinct                  | 32 (9.4)   | 14 (13.6)  | 39 (28.7)        | 13 (29.5)        |
| Indistinct                | 309 (90.6) | 89 (86.4)  | 97 (71.3)        | 31 (70.5)        |
| <b>Inner echo</b>         |            |            | 0.082            | 0.841            |
| even                      | 61 (17.9)  | 11 (10.7)  | 17 (12.5)        | 5 (11.4)         |
| uneven                    | 280 (82.1) | 92 (89.3)  | 119 (87.5)       | 39 (88.6)        |
| <b>Calcification</b>      |            |            | <b>&lt;0.001</b> | <b>&lt;0.001</b> |
| present                   | 123 (36.1) | 86 (83.5)  | 16 (11.8)        | 36 (81.8)        |
| absent                    | 218 (63.9) | 17 (16.5)  | 120 (88.2)       | 8 (18.2)         |
| <b>Color Doppler flow</b> |            |            | 0.152            | 0.979            |
| rich                      | 323 (94.7) | 101 (98.1) | 3 (2.2)          | 1 (2.3)          |
| poor                      | 18 (5.3)   | 2 (1.9)    | 133 (97.8)       | 43 (97.7)        |
| <b>Aspect-ratio</b>       |            |            | <b>&lt;0.001</b> | <b>&lt;0.001</b> |
| ≥1                        | 10 (2.9)   | 24 (23.3)  | 33 (24.3)        | 33 (75.0)        |
| <1                        | 331 (97.1) | 79 (76.7)  | 103 (75.7)       | 11 (25.0)        |

Abbreviations: SLN, sentinel lymph node; OUQ, outer upper quadrant; OLQ, outer lower quadrant; IUQ, inner upper quadrant; ILQ, inner lower quadrant; HR, hormone receptor; TNBC, triple-negative breast cancer; ER, estrogen receptor; PR, progesterone receptor; US, ultrasound.

Bold value indicates statistical significance.

**TABLE S2 |The comparison of the three researches**

| <b>Research</b>               | <b>SOUND</b>                                                                                                         | <b>NAUTILUS</b>                                                                       | <b>Nomogram</b>                    |
|-------------------------------|----------------------------------------------------------------------------------------------------------------------|---------------------------------------------------------------------------------------|------------------------------------|
| <b>Study type</b>             | Clinical trial<br>(international)                                                                                    | Clinical trial (international)                                                        | Retrospective study<br>(2 centers) |
| <b>Condition /disease</b>     | Early-stage BC (<2cm)                                                                                                | Clinical T1, T2 BC (<5cm)                                                             | BC (any size)                      |
| <b>Intervention/treatment</b> | SLNB vs Observation                                                                                                  | BCS + SLNB(-) vs BCS +SLNB                                                            | BCS + SLNB +ALND(-/+)              |
| <b>Outcome measures</b>       | dDFS, DFS, OS,<br>cumulative incidence of<br>distant recurrences,<br>cumulative incidence of<br>axillary recurrences | iDFS, OS, DMFS,<br>axillary recurrence rate,<br>LRR, AEs,<br>evaluate quality of life | SLN metastasis or not              |

Abbreviations: BC, breast cancer; SLNB, sentinel lymph node biopsy; dDFS, distant-disease free survival; DFS, disease free survival; OS, overall survival; BCS, breast conserving surgery; iDFS, invasive disease-free survival; DMFS, distant metastasis free survival; LRR, locoregional recurrence rate; AEs, adverse events; ALND, axillary lymph node dissection.
